# Supplementary material for: Evaluation of the Shelf life of Ready-to-Eat Fresh Bamboo Sprouts (Phyllostachys edulis) Packaged in a Modified Atmosphere or Vacuum: A Comparative Study
Source: MDPI journal article supplement (doi:10.3390/antiox13020185), 2024-02-01
Supplement: s1 [file s1]

## Supplementary materials

**Table S1.** Evolution of  $a_w$  and pH in fresh peeled bamboo sprouts packaged in MAP and VACUUM packaging systems.

| Storage time (days) | MAP 1                      | MAP 2                       | VACUUM                     | Sign. |
|---------------------|----------------------------|-----------------------------|----------------------------|-------|
|                     | $a_w$                      | $a_w$                       | $a_w$                      |       |
| 0                   | 0.996±0.002 <sup>aA</sup>  | 0.996±0.002 <sup>aA</sup>   | 0.994±0.002 <sup>aA</sup>  | ns    |
| 7                   | 0.978±0.001 <sup>bcA</sup> | 0.968±0.001 <sup>bcAB</sup> | 0.966±0.001 <sup>bcB</sup> | **    |
| 14                  | 0.971±0.001 <sup>aA</sup>  | 0.961±0.001 <sup>bA</sup>   | 0.958±0.001 <sup>cB</sup>  | **    |
| 21                  | 0.966±0.001 <sup>bAB</sup> | 0.956±0.001 <sup>bB</sup>   | 0.952±0.001 <sup>bC</sup>  | **    |
| 28                  | 0.957±0.00 <sup>cB</sup>   | 0.950±0.00 <sup>cC</sup>    | 0.948±0.00 <sup>cA</sup>   | **    |
| Sign.               | **                         | **                          | **                         |       |
|                     | pH                         | pH                          | pH                         |       |
| 0                   | 6.36±0.06 <sup>bA</sup>    | 6.36±0.06 <sup>bA</sup>     | 6.12±0.06 <sup>bB</sup>    | *     |
| 7                   | 5.56±0.06 <sup>bA</sup>    | 5.46±0.06 <sup>bB</sup>     | 5.26±0.06 <sup>bC</sup>    | **    |
| 14                  | 5.63±0.06 <sup>abA</sup>   | 5.53±0.06 <sup>abB</sup>    | 5.13±0.06 <sup>abC</sup>   | **    |
| 21                  | 5.68±0.04 <sup>aA</sup>    | 5.38±0.04 <sup>aB</sup>     | 5.08±0.04 <sup>aC</sup>    | **    |
| 28                  | 5.70±0.02 <sup>aA</sup>    | 5.40±0.02 <sup>aC</sup>     | 5.22±0.02 <sup>aC</sup>    | **    |
| Sign.               | **                         | **                          | **                         |       |

MAP: modified atmosphere packaging. MAP1: 2%O<sub>2</sub>, 5%CO<sub>2</sub>, 93%N<sub>2</sub>; MAP2: 3% O<sub>2</sub>, 7% CO<sub>2</sub>, 90 % N<sub>2</sub>. Data are reported as mean ± standard deviation (n = 3). Differences were evaluated by one-way analysis of variance (ANOVA) test completed with a multicomparison Tukey's test. Means in the same column with different capital letters differ significantly (Sign.) (\*\* $p < 0.01$ ), means in the same row with different uppercase differ significantly (\*\* $p < 0.01$ , \* $p < 0.05$ ); ns: not significant.



**Table S2.** CIELab parameters in bamboo sprouts (upper and basal sections) packaged in MAP and VACUUM packaging systems.

| Apical section |                          |                          |                          |       |
|----------------|--------------------------|--------------------------|--------------------------|-------|
| a*             | MAP1                     | MAP2                     | VACUUM                   | Sign. |
| T0             | 3.63±0.71 <sup>aA</sup>  | 3.63±0.71 <sup>aA</sup>  | 0.59±0.71 <sup>aB</sup>  | **    |
| T7             | 0.16±0.48 <sup>bB</sup>  | 0.14±0.48 <sup>bA</sup>  | 0.57±0.48 <sup>bB</sup>  | **    |
| T14            | 0.11±0.37 <sup>b</sup>   | 0.10±0.37 <sup>b</sup>   | 0.58±0.37 <sup>b</sup>   | **    |
| T21            | 0.10±1.00 <sup>bB</sup>  | -1.08±1.00 <sup>cB</sup> | 0.60±1.00 <sup>cA</sup>  | **    |
| T28            | 0.29±0.22 <sup>bB</sup>  | 0.25±0.20 <sup>bB</sup>  | 0.58±0.20 <sup>bA</sup>  | **    |
| Sign.          | **                       | **                       | **                       |       |
| b*             | MAP1                     | MAP2                     | VACUUM                   | Sign. |
| T0             | 19.07±0.97 <sup>aA</sup> | 19.07±0.97 <sup>aA</sup> | 1.97±0.97 <sup>aB</sup>  | **    |
| T7             | 5.82±2.03 <sup>cA</sup>  | 5.45±2.03 <sup>cB</sup>  | 1.95±2.03 <sup>cC</sup>  | **    |
| T14            | 5.20±1.56 <sup>cA</sup>  | 5.00±1.56 <sup>cA</sup>  | 1.95±1.56 <sup>cB</sup>  | **    |
| T21            | 8.76±3.37 <sup>bA</sup>  | 8.50±3.27 <sup>bB</sup>  | 1.97±3.27 <sup>bC</sup>  | **    |
| T28            | 7.21±3.67 <sup>bcA</sup> | 7.00±3.67 <sup>bcA</sup> | 1.96±3.67 <sup>bcB</sup> | **    |
| Sign.          | **                       | **                       | **                       |       |
| Basal section  |                          |                          |                          |       |
| a*             | MAP1                     | MAP2                     | VACUUM                   | Sign. |
| 0              | 3.88±0.60 <sup>aA</sup>  | 3.88±0.60 <sup>aA</sup>  | 0.58±0.60 <sup>aB</sup>  | **    |
| 7              | 0.12±0.14 <sup>bB</sup>  | 0.11±0.14 <sup>bB</sup>  | 0.59±0.14 <sup>bA</sup>  | **    |
| 14             | -1.00±0.40 <sup>cC</sup> | -1.00±0.40 <sup>cA</sup> | 0.58±0.40 <sup>cB</sup>  | **    |
| 21             | 0.02±0.92 <sup>bB</sup>  | 0.02±0.92 <sup>bB</sup>  | 0.61±0.92 <sup>bA</sup>  | **    |
| 28             | -0.03±1.09 <sup>bB</sup> | -0.03±1.09 <sup>bB</sup> | 0.57±1.09 <sup>bA</sup>  | **    |
| Sign.          | **                       | **                       | **                       |       |
| b*             | MAP1                     | MAP2                     | VACUUM                   | Sign. |
| 0              | 19.59±1.06 <sup>aA</sup> | 19.59±1.06 <sup>aA</sup> | 1.96±1.06 <sup>aB</sup>  | **    |
| 7              | 4.30±0.82 <sup>cA</sup>  | 4.30±0.82 <sup>cB</sup>  | 1.95±0.82 <sup>cB</sup>  | **    |
| 14             | 15.53±3.00 <sup>aA</sup> | 14.53±3.00 <sup>aA</sup> | 1.94±3.00 <sup>aB</sup>  | **    |
| 21             | 9.30±5.40 <sup>bA</sup>  | 9.12±5.40 <sup>bB</sup>  | 1.96±5.40 <sup>bC</sup>  | **    |
| 28             | 6.78±3.47 <sup>bcA</sup> | 6.66±3.47 <sup>bcA</sup> | 1.94±3.47 <sup>bcB</sup> | **    |
| Sign.          | **                       | **                       | **                       |       |

MAP: modified atmosphere packaging. MAP1: 2%O<sub>2</sub>, 5%CO<sub>2</sub>, 93%N<sub>2</sub>; MAP2: 3% O<sub>2</sub>, 7% CO<sub>2</sub>, 90 % N<sub>2</sub>. Data are reported as mean ± standard deviation (n = 3). Differences were evaluated by one-way analysis of variance (ANOVA) test completed with a multicomparison Tukey's test. Means in the same column with different capital letters differ significantly (Sign.) (\*\**p* < 0.01), means in the same row with different uppercase differ significantly (\*\**p* < 0.01).



**Table S3.** Evolution of  $\Delta E^*ab$  parameter during bamboo sprouts storage packaged in MAP and VACUUM packaging systems.

| $\Delta E^*ab$ | MAP1                     | MAP2                     | VACUUM                   | Sign. |
|----------------|--------------------------|--------------------------|--------------------------|-------|
| 0              | 0.76±0.02 <sup>eB</sup>  | 0.76±0.03 <sup>eB</sup>  | 9.9±0.87 <sup>bA</sup>   | **    |
| 7              | 10.9±1.88 <sup>bC</sup>  | 13.88±2.08 <sup>aA</sup> | 11.05±1.56 <sup>aB</sup> | **    |
| 14             | 11.06±2.02 <sup>aA</sup> | 10±1.76 <sup>bB</sup>    | 6.48±0.87 <sup>dC</sup>  | **    |
| 21             | 2.65±0.06 <sup>dC</sup>  | 3.31±0.08 <sup>dB</sup>  | 6.93±0.98 <sup>cA</sup>  | **    |
| 28             | 5.62±0.77 <sup>cC</sup>  | 6.61±0.65 <sup>cB</sup>  | 6.93±0.34 <sup>cA</sup>  | **    |
| Sign.          | **                       | **                       | **                       |       |

MAP: modified atmosphere packaging. MAP1: 2%O<sub>2</sub>, 5%CO<sub>2</sub>, 93%N<sub>2</sub>; MAP2: 3% O<sub>2</sub>, 7% CO<sub>2</sub>, 90 % N<sub>2</sub>. Data are reported as mean ± standard deviation (n = 3). Differences were evaluated by one-way analysis of variance (ANOVA) test completed with a multicomparison Tukey's test. Means in the same column with different capital letters differ significantly (Sign.) (\*\**p* < 0.01), means in the same row with different uppercase differ significantly (\*\**p* < 0.01).



**Table S4.** Total Variance Explained

| Component | Initial Eigenvalues |               |              | Rotation Sums of Squared Loadings |               |              |
|-----------|---------------------|---------------|--------------|-----------------------------------|---------------|--------------|
|           | Total               | % of Variance | Cumulative % | Total                             | % of Variance | Cumulative % |
| 1         | 52.170              | 74.529        | 74.529       | 47.264                            | 67.521        | 67.521       |
| 2         | 17.830              | 25.471        | 100.000      | 22.736                            | 32.479        | 100.000      |

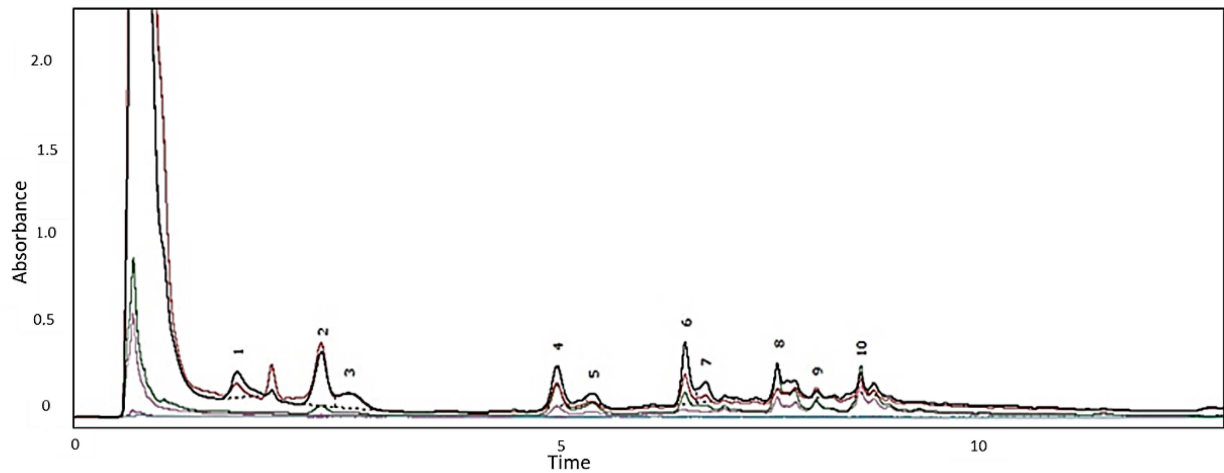

Figure S1. Chromatographic profile of fresh bamboo sprouts: 1 gallic acid; 2 protocatehic; 3 chlorogenic acid; 4 caffeic 5 ferulic 6 isorientin; 7 orientin; 8 isovitexin, 9 p acid; 10 rutin coumaric acid
